# Supplementary material
Source: Springer Nature journal article supplement (https://www.springermedizin.de/resource/supplementary/12876_2008_248_MOESM1_ESM.pdf/9439008)

### 24-hour Esophageal Acidity

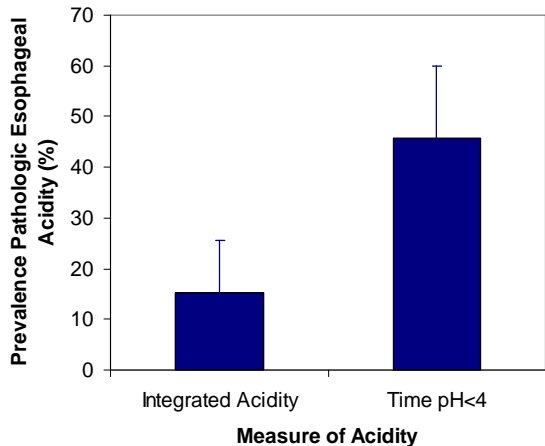

### 24-hour Esophageal Acidity Records with Normal Integrated Acidity and Pathologic Time pH < 4

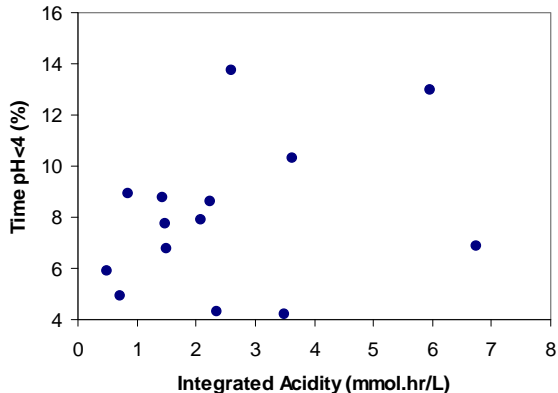

Supplement: MOESM1 [file 9439008]
